# Supplementary material
Source: publisher figshare collection journal article supplement (https://sage.figshare.com/ndownloader/files/15073481)
Supplement: Supplementary file 1 [file 15073481]

**Supplementary Materials**

**Supplementary Table 1.** Fixed-effects estimates for the relationship between patients achieving appropriate screening or control goals and direct student involvement in improving the measure. OR represents the estimated odds ratio comparing screening or control rates in March 2017 to March 2016. N= No students assigned to improve measure. S=At least one student assigned to improve measure. ORS/ ORN represents the ratio comparing ORS to ORN. CI=Confidence Interval. P-values have not been adjusted for multiple comparisons.

| Practice Type | Measure | ORN | ORS | ORS/ ORN | 95% CI for ORS/ ORN | p-value |
| --- | --- | --- | --- | --- | --- | --- |
| Community Health Center (CHC) | Colon Cancer  Screening | 1.065 | 1.249 | 1.172 | (1.009, 1.362) | 0.0406 |
| Breast Cancer  Screening | 0.93 | 1.538 | 1.654 | (1.280, 2.137) | 0.0024 |
| Hypertension Control | 1.161 | 1.496 | 1.288 | (1.095, 1.515) | 0.0077 |
| UNC Academic and Affiliate practices | Colon Cancer  Screening (PCIC) | 1.193 | 1.409 | 1.181 | (1.106, 1.262) | <.0001 |
| Colon Cancer  Screening (Non-PCIC) | 2.534 | 1.928 | 0.761 | (0.445, 1.300) | 0.2821 |
| Breast Cancer Screening (PCIC) | 1.519 | 2.069 | 1.362 | (1.227, 1.512) | <.0001 |
| Cervical Cancer Screening (PCIC) | 1.746 | 2.193 | 1.256 | (1.184, 1.332) | <.0001 |
| Diabetes: A1c Control (PCIC) | 1.197 | 1.102 | 0.921 | (0.830, 1.022) | 0.1153 |
| Diabetes: Statin (PCIC) | 1.700 | 1.936 | 1.139 | (0.906, 1.431) | 0.2510 |

**Supplementary Table 2.** Fixed-effects estimates for the relationship between patients achieving appropriate screening or control goals and student involvement in improving an alternate measure. OR represents the estimated odds ratio comparing screening or control rates in March 2017 to March 2016. N= No students assigned to improve measure. S=At least one student assigned to improve alternative measure. ORS/ ORN represents the ratio comparing ORS to ORN. CI=Confidence Interval. P-values have not been adjusted for multiple comparisons.

| Practice Type | Measure | ORN | ORS | | | ORS/ ORN | 95% CI for ORS/ ORN | p-value |
| --- | --- | --- | --- | --- | --- | --- | --- | --- |
| Community Health Center (CHC) | Colon Cancer  Screening | 1.261 | | 0.855 | 0.678 | | (0.542, 0.849) | 0.0086 |
| Breast Cancer  Screening | 0.964 | | 0.905 | 0.94 | | (0.743, 1.188) | 0.5256 |
| Hypertension Control | 1.196 | | 1.138 | 0.952 | | (0.795, 1.139) | 0.5121 |
| Opioid Metric | 0.914 | | 0.563 | 0.616 | | (0.330, 1.150) | 0.1063 |
| Academic and Affiliate practices | Colon Cancer Screening (PCIC) | 1.157 | | 1.267 | 1.096 | | (1.027, 1.168) | 0.0075 |
| Breast Cancer Screening (PCIC) | 1.436 | | 1.659 | 1.155 | | (1.061, 1.258) | 0.0020 |
| Breast Cancer Screening (Non-PCIC) | 2.3 | | 2.345 | 1.02 | | (0.483, 2.154) | 0.9549 |
| Cervical Cancer Screening (PCIC) | 1.646 | | 2.359 | 1.433 | | (1.291, 1.591) | <.0001 |
| Cervical Cancer Screening (Non-PCIC) | 2.347 | | 3.422 | 1.458 | | (0.851, 2.500) | 0.1500 |
| Diabetes: A1c Control (PCIC) | 1.116 | | 1.512 | 1.355 | | (1.168, 1.571) | 0.0004 |
| Diabetes: A1c Control (Non-PCIC) | 1.162 | | 0.873 | 0.752 | | (0.359, 1.575) | 0.4053 |
| Diabetes: Statin  (PCIC) | 1.551 | | 1.93 | 1.244 | | (1.095, 1.414) | 0.0018 |
|  | Diabetes: Statin  (Non-PCIC) | 1.283 | | 1.916 | 1.493 | | (0.519, 4.293) | 0.4173 |
